# Supplementary material for: Emerging diseases of Cannabis sativa and sustainable management
Source: PubMed Central journal article supplement (PMC8451794; doi:10.1002/ps.6307), 2021-02-27
Supplement: PS-77-3857-s002.pdf [file PS-77-3857-s002.pdf]

**Supplementary Table 1. Emerging pathogens reported on cannabis and hemp plants during 2017-2020.**

| Common name of disease        | Pathogen                               | Crop plant                  |                | Reference                   |
|-------------------------------|----------------------------------------|-----------------------------|----------------|-----------------------------|
|                               |                                        | Cannabis (Indoor/ Outdoor*) | Hemp (Outdoor) |                             |
| Bud rots                      | <i>Alternaria alternata</i>            | +                           | +              | 1, 2 , unpublished          |
|                               | <i>Botrytis cinerea</i>                | +                           | +              | 1, 2, 3, 4, 5, 6, 7, 8      |
|                               | <i>Botrytis pseudocinerea</i>          | +                           | +              | 9; this study               |
|                               | <i>Botrytis porri</i>                  | +                           | -              | Unpublished                 |
|                               | <i>Chaetomium globosum</i>             | +                           | -              | Unpublished                 |
|                               | <i>Diaporthe eres/ D. subordinaria</i> | +                           | -              | Unpublished                 |
|                               | <i>Fusarium equiseti</i>               | +                           | +              | 1, 2, 10, 11                |
|                               | <i>Fusarium graminearum</i>            | +                           | +              | 2, 3, 11, unpublished       |
|                               | <i>Fusarium oxysporum</i>              | +                           | -              | 6, 7, 10, 12                |
|                               | <i>Fusarium proliferatum</i>           | +                           | -              | 6, 13                       |
|                               | <i>Fusarium solani</i>                 | +                           | -              | 10                          |
|                               | <i>Fusarium sporotrichiodes</i>        | +                           | -              | 6                           |
|                               | <i>Phoma multirostrata</i>             | +                           | -              | Unpublished                 |
|                               | <i>Sclerotinia sclerotiorum</i>        | +                           | -              | Unpublished                 |
| Crown and root rots and wilts | <i>Fusarium avenaceum</i>              | +                           | +              | 6, unpublished              |
|                               | <i>Fusarium brachygibbosum</i>         | +                           | -              | 8, 14                       |
|                               | <i>Fusarium graminearum</i>            | -                           | +              | 3, 15                       |
|                               | <i>Fusarium lichenicola</i>            | +                           | -              | 16                          |
|                               | <i>Fusarium oxysporum</i>              | +                           | +              | 1, 2, 8, 11, 12, 15, 17, 18 |
|                               | <i>Fusarium proliferatum</i>           | +                           | -              | 1,13                        |
|                               | <i>Fusarium solani</i>                 | +                           | +              | 1, 17, 19                   |
|                               | <i>Fusarium tricinctum</i>             | +                           | +              | 6, unpublished              |
|                               | <i>Globisporangium irregulare</i>      | +                           | +              | 18, unpublished             |
|                               | <i>Globisporangium ultimum</i>         | +                           | +              | 2, 11, 20, 21               |
|                               | <i>Phytophthora sp.</i>                | +                           | -              | Unpublished                 |
|                               | <i>Pythium aphanidermatum</i>          | +                           | +              | 11, 17, 19, 21, 22          |
|                               | <i>Pythium catenulatum</i>             | +                           | -              | 8, 21                       |
|                               | <i>Pythium dissotocum</i>              | +                           | -              | 19, 21                      |
| <i>Pythium myriotylum</i>     | +                                      | +                           | 19, 21, 23     |                             |

|                                             |                                          |   |   |                   |
|---------------------------------------------|------------------------------------------|---|---|-------------------|
|                                             | <i>Rhizoctonia solani</i>                | + | + | 2, 3, 11, 15, 24  |
|                                             | <i>Sclerotinia minor</i>                 | - | + | 25                |
|                                             | <i>Thielaviopsis basicola</i>            | - | + | Unpublished       |
|                                             | <i>Verticillium dahliae/V.albo-atrum</i> | + | + | 26, unpublished   |
| <b>Crown gall</b>                           | <i>Agrobacterium tumefaciens</i>         | + | - | Unpublished       |
| <b>Damping-off</b>                          | <i>Alternaria alternata</i>              | - | + | 2, unpublished    |
|                                             | <i>Botrytis cinerea</i>                  | + | + | 2, 12, 10, 11, 17 |
|                                             | <i>Fusarium oxysporum</i>                | + | + | 1, 2, 8, 12, 17   |
|                                             | <i>Fusarium proliferatum</i>             | + | - | 13, 27            |
|                                             | <i>Fusarium solani</i>                   | + | + | 16                |
|                                             | <i>Fusarium sporotrichiodes</i>          | + | - | 6                 |
|                                             | <i>Pythium aphanidermatum</i>            | + | + | 8, 20             |
|                                             | <i>Sclerotinia sclerotiorum</i>          | + | + | 2, 3, 15          |
|                                             | <i>Stemphylium vesicarium</i>            | - | + | Unpublished       |
| <b>Downy mildew</b>                         | <i>Pseudoperonospora humuli</i>          | - | + | 28                |
| <b>Fungal leaf spots,<br/>foliar blight</b> | <i>Alternaria alternata</i>              | - | + | 1, 2              |
|                                             | <i>Bipolaris gigantea</i>                | - | + | 2, 3, 17, 29      |
|                                             | <i>Botrytis cinerea</i>                  | + | - | 1, 2, unpublished |
|                                             | <i>Cercospora cf. flagellaris</i>        | - | + | 30, 31, 32        |
|                                             | <i>Chaetomium globosum</i>               | - | + | 33                |
|                                             | <i>Colletotrichum fioriniae</i>          | - | + | 34                |
|                                             | <i>Curvularia pseudobrachyspora</i>      | - | + | 17, 31            |
|                                             | <i>Rhizoctonia solani</i>                | - | + | 24                |
|                                             | <i>Septoria sp.</i>                      | - | + | 2, 3              |
| <b>Bacterial leaf<br/>spots</b>             | <i>Pseudomonas koreensis</i>             | - | + | 11                |
|                                             | <i>Serratia marcescens</i>               | - | + | 11, 35            |
|                                             | <i>Sphingomonas yanoikuyae</i>           | - | + | 11                |
| <b>Post-harvest rots</b>                    | <i>Botrytis cinerea</i>                  | + | + | 1, 6, 8, 10, 36   |
|                                             | <i>Chaetomium globosum</i>               | + | - | Unpublished       |
|                                             | <i>Penicillium spp.</i>                  | + | - | 1, 6, 8, 10       |
|                                             | <i>Fusarium oxysporum</i>                | + | - | 6, 10, 12         |
|                                             | <i>Fusarium proliferatum</i>             | + | - | 6, 13             |
|                                             | <i>Fusarium sporotrichiodes</i>          | + | - | 6                 |
| <b>Powdery mildew</b>                       | <i>Golovinomyces cichoracearum</i>       | + | + | 8, 10, 17, 37     |
|                                             | <i>Golovinomyces ambrosiae</i>           | - | + | 37                |

|                       |                                                      |   |   |                    |
|-----------------------|------------------------------------------------------|---|---|--------------------|
|                       | <i>Golovinomyces spadiceus</i>                       | - | + | 38, 39             |
|                       | <i>Podosphaeria macularis</i>                        | + | + | 9, 40, 41, 42      |
| Stem canker / dieback | <i>Alternaria alternata</i>                          | + | + | Unpublished        |
|                       | <i>Botrytis cinerea</i>                              | + | + | 4, 8               |
|                       | <i>Diaporthe eres</i>                                | + | - | Unpublished        |
|                       | <i>Fusarium chlamydosporum</i>                       | - | + | 17                 |
|                       | <i>Fusarium graminearum</i>                          | - | + | 2, 11, unpublished |
|                       | <i>Lasiodiplodia theobromae</i>                      | + | + | 17, unpublished    |
|                       | <i>Neofusicoccum parvum</i>                          | + | + | 17, unpublished    |
|                       | <i>Phoma multirostrata</i>                           | + | - | Unpublished        |
|                       | <i>Sclerotinia sclerotiorum</i>                      | + | + | 2, 3, 31, 43       |
| Southern blight       | <i>Sclerotium rolfsii</i>                            | - | + | 2, 11, 15, 44, 45  |
| Viruses/viroids       | Beet curly top virus                                 | - | + | 46, 47             |
|                       | Cannabis cryptic virus                               | + | + | 47, 48             |
|                       | Cannabis sativa mitovirus 1                          | - | + | 47                 |
|                       | Citrus yellow-vein associated virus                  | - | + | 47                 |
|                       | Hop latent viroid                                    | + | + | 47, 49, 50         |
|                       | Lettuce chlorosis virus                              | + | + | 51                 |
|                       | Tobacco streak virus                                 | - | + | 46                 |
| Nematodes             | Root knot nematodes ( <i>Meloidogyne incognita</i> ) | - | + | 2, 11              |

Unpublished = author's personal observations confirmed by pathogenicity tests.

+ = pathogen detected; - = pathogen absent based on published reports. All identifications reported are based on molecular methods that include PCR and sequencing, with pathogenicity testing where available.

\* Refers to outdoor grown cannabis.

## REFERENCES

- Jerushalmi S, Maymon M, Dombrovsky and Freeman S, Fungal pathogens affecting the production and quality of medical cannabis in Israel. *Plants* 9, 882 (2020). doi:10.3390/plants9070882.
- Science of Hemp: Production and Pest Management, Proceedings of the first annual scientific conference, by eds. Gauthier N, Leonberger K, Bowers K, Publication SR-112, College of Agriculture, Food and Environment, University of Kentucky, Lexington (2020). <https://plantpathology.ca.uky.edu/files/sr112.pdf> [accessed on July 12 2020].

- 3 Bergstrom G, Starr J and Myers K, Diseases affecting hemp in New York. Cornell College of Agriculture and Life Sciences (2020). [https://cpb-us-e1.wpmucdn.com/blogs.cornell.edu/dist/a/7491/files/2020/09/2020-HempDiseaseHandout\\_compressed.pdf](https://cpb-us-e1.wpmucdn.com/blogs.cornell.edu/dist/a/7491/files/2020/09/2020-HempDiseaseHandout_compressed.pdf) [accessed 8 October 2020].
- 4 Garfinkel AR, Three *Botrytis* species found causing gray mold on industrial hemp (*Cannabis sativa*) in Oregon. *Plant Dis* 104:2026 (2020).
- 5 Jerushalmi S, Maymon M, Dombrovsky A and Freeman S, Effects of cold plasma, gamma and e-beam irradiations on reduction of fungal colony forming unit levels in medical cannabis inflorescences. *J Cannabis Res* 2:12 (2020).
- 6 Punja ZK, The diverse mycoflora present on dried cannabis (*Cannabis sativa* L.) inflorescences in commercial production. *Can J Plant Pathol* (2021). doi: 10.1080/07060661.2020.1758959.
- 7 Punja ZK, Diseases that can devastate *Cannabis sativa* L. - root and crown rots, powdery mildew and bud rots. *Can J Plant Path* (2020) 42 (abstr.) (2020).
- 8 Punja ZK, Collyer D, Scott C, Lung S, Holmes J and Sutton D, Pathogens and molds affecting production and quality of *Cannabis sativa* L. *Front Plant Sci* (2019) <https://doi.org/10.3389/fpls.2019.01120>.
- 9 Garfinkel A, Multiple *Botrytis* and powdery mildew species associated with industrial hemp in Oregon. Amer Phytopath Soc Ann Meet abstr. (2020). <https://apsnet.confex.com/apsnet/2020/meetingapp.cgi/Paper/16975> [accessed 8 August 2020].
- 10 Punja ZK, Flower and foliage-infecting pathogens of marijuana (*Cannabis sativa* L.) plants. *Can J Plant Pathol* 40:514-527 (2018).
- 11 Thiessen LD, Schappe T, Cochran S, Hicks K and Post AR, Surveying for potential diseases and abiotic disorders of industrial hemp (*Cannabis sativa* L.) production. *Plant Health Progress* 21:321-332 (2020). doi/10.1094/PHP-03-20-0017-RS.
- 12 Punja ZK, Epidemiology of *Fusarium oxysporum* causing root and crown rot of cannabis (*Cannabis sativa* L., marijuana) plants in commercial greenhouse production. *Can J. Plant Pathol* (2021).doi: 10.1080/07060661.2020.1788165.
- 13 Punja ZK, First report of *Fusarium proliferatum* causing crown and stem rot, and pith necrosis, in cannabis (*Cannabis sativa*, L., marijuana) plants. *Can J Plant Pathol* (2021). doi: 10.1080/07060661.2020.1793222.
- 14 Punja ZK, Scott C and Chen S, Root and crown rot pathogens causing wilt symptoms on field-grown marijuana (*Cannabis sativa* L.) plants. *Can J Plant Pathol* 40: 528-541 (2018).
- 15 Thiessen L, Root diseases prevalent in industrial hemp (2019). <https://plantpathology.ces.ncsu.edu/2019/08/root-diseases-prevalent-in-industrial-hemp/> [accessed on 25 September 2020].

- 16 Punja ZK, Brown root rot and crown rot of cannabis (*Cannabis sativa* L., marijuana) plants caused by *Fusarium (Cylindrocarpon) lichenicola*. Amer Phytopath Soc Ann Meet abstr. (2020).  
<https://apsnet.confex.com/apsnet/2020/meetingapp.cgi/Paper/16064> [accessed 3 September 2020].
- 17 Feng C, Villarroel-Zeballos M, Fichaux P, Zima H and Correll J, Hemp diseases in Arkansas. Amer Phytopath Soc Ann Meet abstr. (2020).  
<https://apsnet.confex.com/apsnet/2020/meetingapp.cgi/Paper/16685> [accessed 7 August 2020].
- 18 McGehee CS and Raudales RE, Characterization of oomycetes and fungi from the substrate of marijuana (*Cannabis sativa* L.) plants. Amer Phytopath Soc Ann Meet abstr. (2020).  
<https://apsnet.confex.com/apsnet/2020/meetingapp.cgi/Paper/17488> [accessed 2 October 2020].
- 19 Punja ZK and Rodriguez G, *Fusarium* and *Pythium* species infecting roots of hydroponically grown marijuana (*Cannabis sativa* L.) plants. *Can J Plant Pathol* **40**:498-513 (2018).
- 20 Beckerman J, Stone J, Ruhl G and Creswell T, 2018. First report of *Pythium ultimum* crown and root rot of industrial hemp in the United States. *Plant Dis* **102**: 2045 (2018).
- 21 Punja ZK, Scott C, Lung S and Roberts A, *Pythium* species associated with crown and root rot on cannabis (*Cannabis sativa* L., marijuana) plants grown under commercial greenhouse conditions. Amer Phytopath Soc Ann Meet abstr. (2020).  
<https://apsnet.confex.com/apsnet/2020/meetingapp.cgi/Paper/16853> [accessed 16 September 2020].
- 22 Beckerman J, Nisonson H, Albright N and Creswell T, First report of *Pythium aphanidermatum* crown and root rot of industrial hemp in the United States. *Plant Dis* **101**:1038 (2017).
- 23 McGehee CS, Apicella P, Raudales R, Berkowitz G, Ma Y, Durocher S and Lubell J, First report of root rot and wilt caused by *Pythium myriotylum* on hemp (*Cannabis sativa* L.) in the United States. *Plant Dis* **103**: 3288 (2019).
- 24 Pacific Northwest Plant Disease Management Handbook. Hemp (*Cannabis sativa*) - Rhizoctonia soreshin and root rot, by eds. Pscheidt JW and Ocamb CM, Oregon State University, Corvallis, OR (2020). <https://pnwhandbooks.org/plantdisease/host-and-disease-descriptions?title=Cannabis+sativa> [accessed 30 August 2020].
- 25 Koike ST, Stanghellini H, Mauzey SJ and Burkhardt A, First report of sclerotinia crown rot caused by *Sclerotinia minor* on hemp. *Plant Dis* **103**:1771 (2019).
- 26 Pacific Northwest Pest Management Handbook. Hemp (*Cannabis sativa*) - Verticillium wilt, by eds. Pscheidt JW and Ocamb CM, Oregon State University, Corvallis, OR (2020).  
<https://pnwhandbooks.org/plantdisease/host-and-disease-descriptions?title=Cannabis+sativa> [accessed 30 August 2020].

- 27 Lung S, Betz EC, Roberts AJ and Punja ZK, Infection of *Cannabis sativa* cuttings by *Fusarium oxysporum* and *Fusarium proliferatum* and investigation into potential biofungicide control. *Can J Plant Pathol* **42**: 461 (abstr.) (2020).
- 28 Plant Disease Diagnostic Clinic, Cornell University. Mildew of hops: *Podosphaera* and *Pseudoperonospora* (2018), Ithaca, NY.  
<http://plantclinic.cornell.edu/factsheets/mildewsofhops.pdf> [accessed 30 August 2020].
- 29 Szarka D, Amsden B, Beale J, Dixon E, Schardl CL and Gauthier N, First report of hemp leaf spot caused by a *Bipolaris* species on hemp (*Cannabis sativa*) in Kentucky. *Plant Health Progress* **21**:82-84 (2020).
- 30 Doyle VP, Tonry HT, Amsden B, Beale J, Dixon E, Li H, Szarka D and Gauthier NW, First report of *Cercospora* cf. *flagellaris* on industrial hemp (*Cannabis sativa*) in Kentucky. *Plant Dis* **103**:1784 (2019).
- 31 Marin M, Wang N-Y, Coburn J, Desaeger J and Peres N, Etiology of emerging leaf spot diseases on industrial hemp (*Cannabis sativa*) in Florida. Amer Phytopath Soc Ann Meet abstr. (2020).  
<https://apsnet.confex.com/apsnet/2020/meetingapp.cgi/Paper/16959> [accessed 8 July 2020].
- 32 Martin MV, Coburn J, Desaeger J and Peres NA, First report of *Cercospora* leaf spot caused by *Cercospora* cf. *flagellaris* on industrial hemp in Florida. *Plant Dis* **104**:1536 (2020).
- 33 Chaffin AG, Dee ME, Boggess SL, Trigiano RN, Bernard EC and Gwinn KD, First report of *Chaetomium globosum* causing a leaf spot of hemp (*Cannabis sativa*) in Tennessee. *Plant Dis* **104** (2020).  
<https://doi.org/10.1094/PDIS-08-19-1697-PDN>.
- 34 Szarka D, McCulloch M, Beale J, Long S, Dixon E and Gauthier N, First report of anthracnose leaf spot caused by *Colletotrichum fioriniae* on hemp (*Cannabis sativa*). *Plant Dis* **104**:1560 (2020).
- 35 Schappe TL, Ritchie D and Thiessen LD, First report of *Serratia marcescens* causing a leaf spot on industrial hemp (*Cannabis sativa*). *Plant Dis* **104**:1248.
- 36 Punja ZK, Cannabis and hemp biology and pathology: an overview of the crop and emerging pathogens. Amer Phytopath Soc Ann Meet abstr. (2020).  
<https://apsnet.confex.com/apsnet/2020/meetingapp.cgi/Paper/15576> [accessed 3 September 2020].
- 37 Pépin N, Punja ZK and Joly DL, Occurrence of powdery mildew caused by *Golovinomyces cichoracearum sensu lato* on *Cannabis sativa* in Canada. *Plant Dis* **102**:2644-2644 (2018).
- 38 Cala AR, Day CTC, Giles G, Carlson C, Stack G, Ullrich M, Crawford J, Smart L and Smart CD, Evaluation of hemp powdery mildew host resistance and host range. Amer Phytopath Soc Ann Meet abstr. (2020). <https://apsnet.confex.com/apsnet/2020/meetingapp.cgi/Paper/16386> [accessed 30 September 2020].
- 39 Szarka D, Tymon L, Amsden B and Dixon E, First report of powdery mildew caused by *Golovinomyces spadiceus* on industrial hemp (*Cannabis sativa*) in Kentucky. *Plant Dis* **103**: 1773 (2019).

- 40 Gent DH, Nelson ME, George AE, Grove GG, Mahaffee WF, Ocamb CM, et al., A decade of hop powdery mildew in the Pacific northwest. *Plant Health Progress* **9** (2018).
  - 41 Punja ZK, First report of the hops powdery mildew pathogen, *Podosphaeria macularis*, on naturally infected marijuana (*Cannabis sativa* L.) plants in the field. Amer Phytopath Soc Ann Meet abstr. (2020). <https://apsnet.confex.com/apsnet/2020/meetingapp.cgi/Paper/16065> [accessed 7 September 2020].
  - 42 Weldon WA, Ullrich MR, Smart LB, Smart CD and Gadoury DM, Cross-infectivity of powdery mildew isolates originating from hemp (*Cannabis sativa*) and Japanese hop (*Humulus japonicus*) in New York. *Plant Health Progress* **21**:47-53 (2020).
  - 43 Bain PS, Bennypaul HS, Blade SF and Weeks C, First report of hemp canker caused by *Sclerotinia sclerotiorum* in Alberta, Canada. *Plant Dis* **84**:372 (2007).
  - 44 Mersha Z, Kering M and Ren S, Southern blight of hemp caused by *Athelia rolfsii* detected in Virginia. *Plant Dis* **104**:1562 (2020).
  - 45 Morgan J, Louisiana: industrial hemp hit hard by southern blight (2020). <https://agfax.com/2020/07/24/louisiana-industrial-hemp-hit-hard-by-southern-blight/> [accessed 17 August 2020].
  - 46 Giladi Y, Hadad L, Luria N, Cranshaw W, Lachman O and Dombrovsky A, First report of beet curly top virus infecting *Cannabis sativa* in western Colorado. *Plant Dis* **104** (2020). <https://doi.org/10.1094/PDIS-08-19-1656-PDN>.
  - 47 Nachappa P, Fulladolsa AC and Stenglein M, Wild wild west: emerging viruses and viroids of hemp. *Outlooks Pest Manag* **31**:175-179 (2020).
  - 48 Righetti L, Paris R, Ratti C, Calassanzio M, Onofri C, Calzolari D, et al., Not the one, but the only one: about *Cannabis cryptic virus* in plants showing ‘hemp streak’ disease symptoms. *Eur J Plant Pathol* **150**: 575-588 (2017).
  - 49 Bektas A, Hardwick KM, Waterman K and Kristof J, Occurrence of hop latent viroid in *Cannabis sativa* with symptoms of cannabis stunting disease in California. *Plant Dis* **103**: 2699 (2019).
  - 50 Warren JG, Mercado J and Grace D, Occurrence of hop latent viroid causing disease in *Cannabis sativa* in California. *Plant Dis* **103**: 2699 (2019).
  - 51 Hadad L, Luria N, Smith E, Sela N, Lachman O and Dombrovsky A, Lettuce chlorosis virus disease: a new threat to cannabis production. *Viruses* **11**:802 (2019).
-
