# Supplementary material for: Emerging diseases of Cannabis sativa and sustainable management
Source: PubMed Central journal article supplement (PMC8451794; doi:10.1002/ps.6307), 2021-02-27

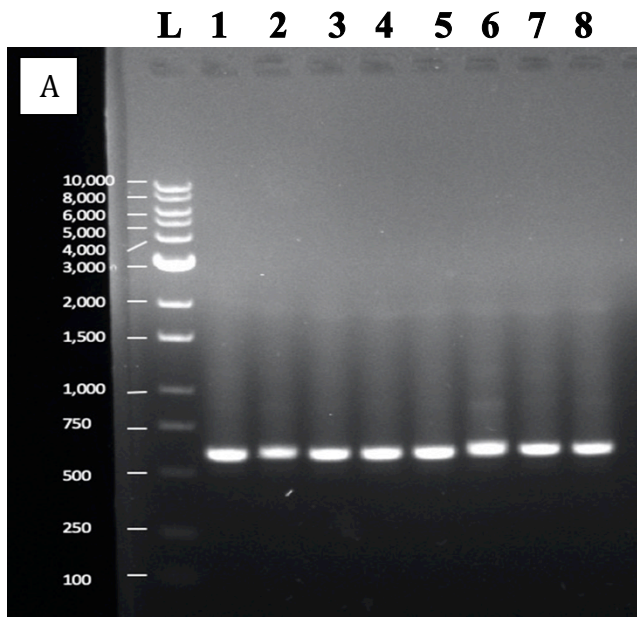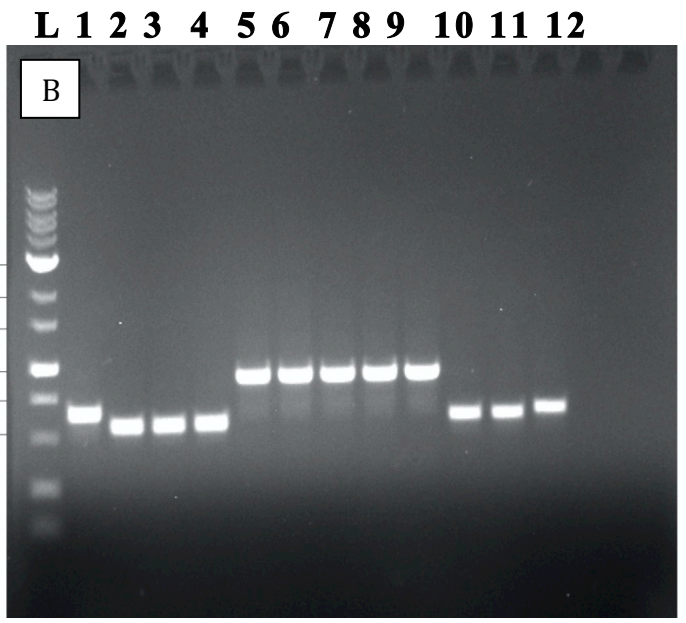

Supplement: PS-77-3857-s003.pdf [file PS-77-3857-s003.pdf]
