# Supplementary material for: Emerging diseases of Cannabis sativa and sustainable management
Source: PubMed Central journal article supplement (PMC8451794; doi:10.1002/ps.6307), 2021-02-27
Supplement: PS-77-3857-s006.pdf [file PS-77-3857-s006.pdf]

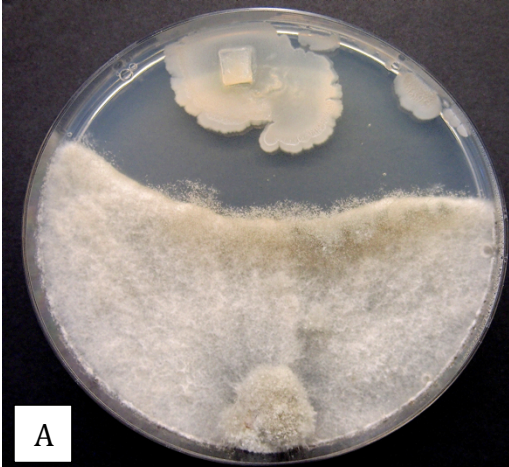

A

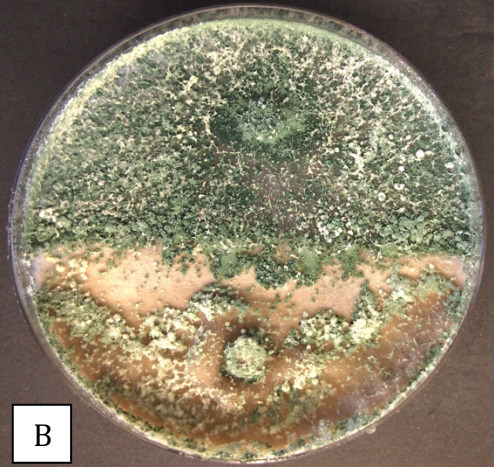

B

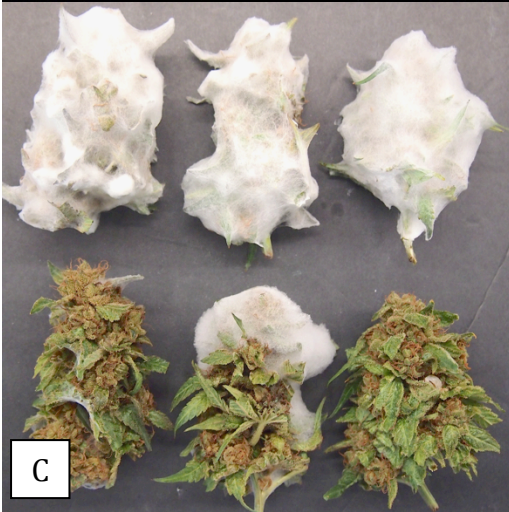

C

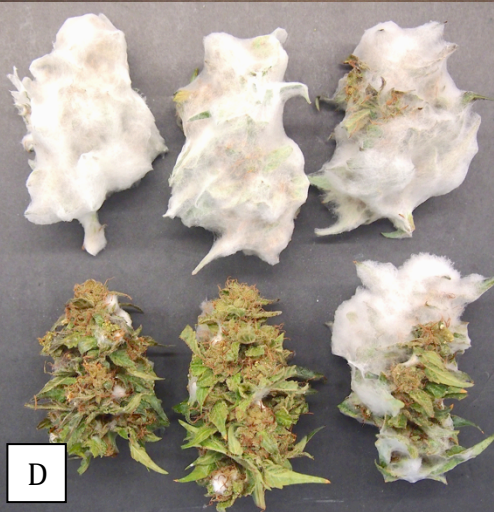

D
